# Supplementary material for: Cu induced low temperature ordering of fct-FePtCu nanoparticles prepared by solution phase synthesis
Source: Royal Society of Chemistry journal article supplement (doi:10.1039/c9tc03961a), 2019-01-01
Supplement: c9tc03961a1.pdf [file c9tc03961a1.pdf]

## Cu induced low temperature ordering of fct-FePtCu nanoparticles prepared by solution phase synthesis

Wenjuan lei, Yongsheng Yu\* and Weiwei Yang\*

*MIT Key Laboratory of Critical Materials Technology for New Energy Conversion and Storage, School of Chemistry and Chemical Engineering, Harbin Institute of Technology, Harbin, Heilongjiang 150001, China.*

\* E-mail: ysyu@hit.edu.cn

\* E-mail: yangww@hit.edu.cn

### Supporting information including:

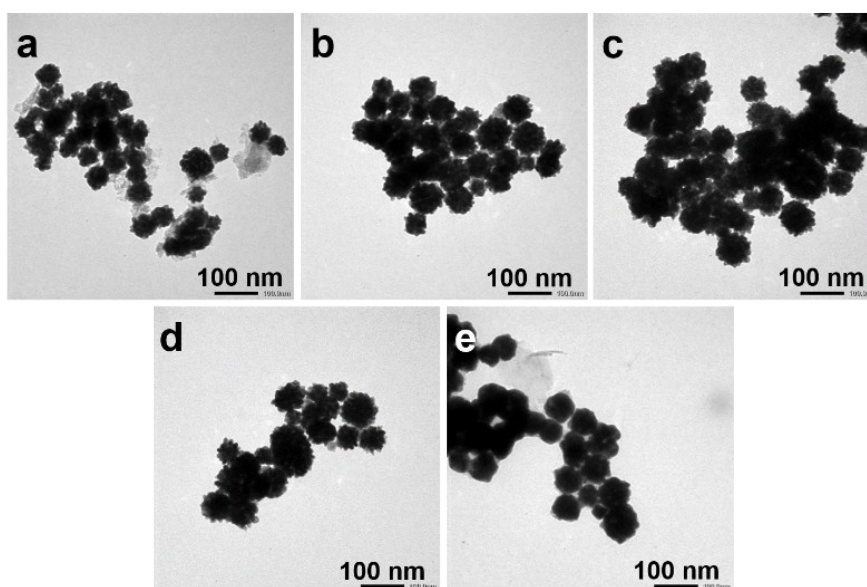

**Fig. S1.** The TEM of FePtCu NPs synthesized with a  $\text{Cu}^{2+}/\text{Pt}^{4+}$  mole ratio of 0.25 at various temperature for 3 h: (a) 270 °C, (b) 290 °C, (c) 310 °C, (d) 330 °C and (e) 350 °C.

**Table S1**

Composition, magnetic properties and lattice parameters measured using XRD of the fct-phases for FePtCu NPs synthesized with a  $\text{Cu}^{2+}/\text{Pt}^{4+}$  mole ratio of 0.25 at various reaction temperature for 3 h.

| Reaction temperature (°C) | Measured composition                         | $d_{(111)}$ (nm) | $a$ (nm) | $c$ (nm) | $c/a$ | $S$   |
|---------------------------|----------------------------------------------|------------------|----------|----------|-------|-------|
| 270                       | $\text{Fe}_{30}\text{Pt}_{54}\text{Cu}_{16}$ | 0.223            | 0.386    | 0.386    | 1     | 0     |
| 290                       | $\text{Fe}_{33}\text{Pt}_{52}\text{Cu}_{15}$ | 0.223            | 0.387    | 0.386    | 0.998 | 0.238 |
| 310                       | $\text{Fe}_{32}\text{Pt}_{53}\text{Cu}_{16}$ | 0.222            | 0.386    | 0.380    | 0.985 | 0.654 |

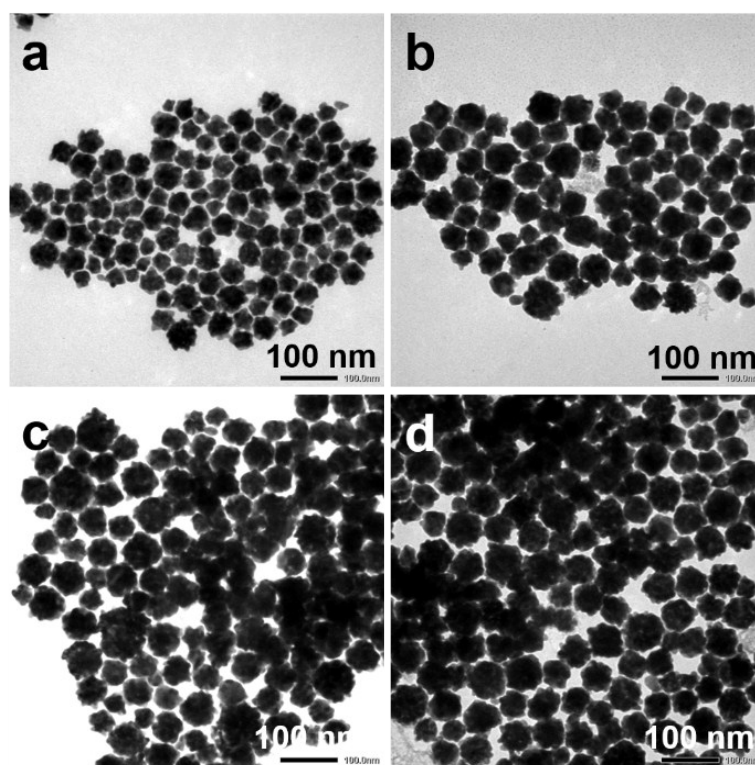

**Fig. S2.** The TEM of FePtCu NPs synthesized with a  $\text{Cu}^{2+}/\text{Pt}^{4+}$  mole ratio of 0.25 at 310 °C for various reaction time: (a) 1 h, (b) 3 h, (c) 6 h and (d) 9 h.

**Table S2**

Composition, magnetic properties and lattice parameters measured using XRD of the fct-phases for FePtCu NPs synthesized with a  $\text{Cu}^{2+}/\text{Pt}^{4+}$  mole ratio of 0.25 at 310 °C for various reaction time.

| Reaction time (h) | Measured composition                         | $d_{(111)}$ (nm) | $a$ (nm) | $c$ (nm) | $c/a$ | $S$   |
|-------------------|----------------------------------------------|------------------|----------|----------|-------|-------|
| 1                 | $\text{Fe}_{30}\text{Pt}_{54}\text{Cu}_{16}$ | 0.222            | 0.387    | 0.386    | 0.998 | 0.222 |
| 3                 | $\text{Fe}_{32}\text{Pt}_{53}\text{Cu}_{15}$ | 0.222            | 0.386    | 0.380    | 0.984 | 0.654 |
| 6                 | $\text{Fe}_{39}\text{Pt}_{48}\text{Cu}_{13}$ | 0.220            | 0.385    | 0.374    | 0.971 | 0.894 |
| 9                 | $\text{Fe}_{44}\text{Pt}_{43}\text{Cu}_{13}$ | 0.220            | 0.386    | 0.373    | 0.967 | 0.957 |

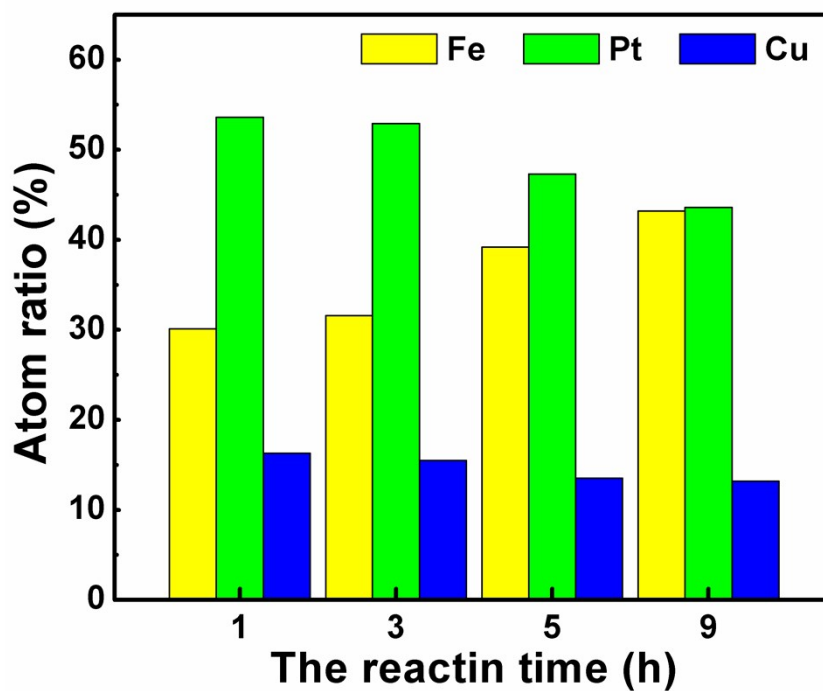

**Fig. S3.** The composition analysis of the fct-FePtCu NPs synthesized with a  $\text{Cu}^{2+}/\text{Pt}^{4+}$  mole ratio of 0.25 at 310 °C for various reaction time.

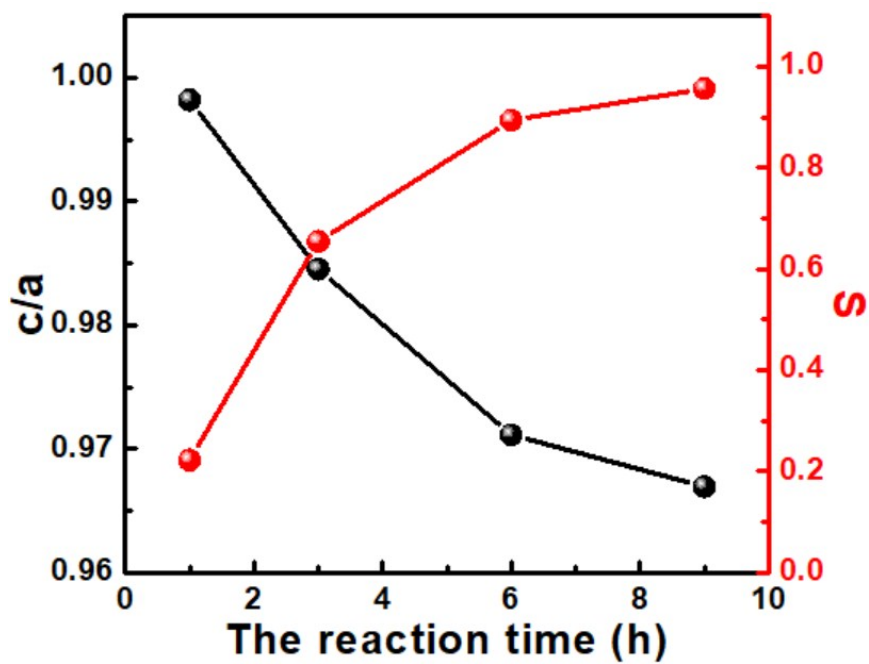

**Fig. S4.** The  $c/a$  ratios and order parameter  $S$  versus reaction time of the fct-FePtCu NPs synthesized with a  $\text{Cu}^{2+}/\text{Pt}^{4+}$  mole ratio of 0.25 at 310 °C for various reaction time.
